# **You Will Grasp Again: A Direct Spinal Cord/Computer Interface with the Spared Motor Neurons Restores the Dexterous Control of the Paralyzed Hand after Chronic Spinal Cord Injury**

Daniela Souza Oliveira<sup>1</sup>, Matthias Ponfick<sup>2</sup>, Dominik I. Braun<sup>1</sup>, Marius Osswald<sup>1</sup>, Marek Sierotowicz<sup>1</sup>, Satyaki Chatterjee<sup>1</sup>, Douglas Weber<sup>3,4</sup>, Bjoern Eskofier<sup>1</sup>, Claudio Castellini<sup>1,5</sup>, Dario Farina<sup>6</sup>, Thomas Mehari Kinfe<sup>1,7\*</sup>, and Alessandro Del Vecchio<sup>1\*</sup>

## **Affiliations:**

<sup>1</sup>Department Artificial Intelligence in Biomedical Engineering, Friedrich-Alexander-Universität Erlangen-Nürnberg, Erlangen, Germany.

<sup>2</sup>Querschnittszentrum Rummelsberg, Krankenhaus Rummelsberg GmbH, Schwarzenbruck, Germany.

<sup>3</sup>Department of Mechanical Engineering, Carnegie Mellon University, Pittsburgh, Pennsylvania.

<sup>4</sup>Neuroscience Institute, Carnegie Mellon University, Pittsburgh, Pennsylvania.

<sup>5</sup>Institute of Robotics and Mechatronics, German Aerospace Center (DLR), Oberpfaffenhofen, Germany.

<sup>6</sup>Department of Bioengineering, Imperial College London, London, United Kingdom.

<sup>7</sup>Division of Functional Neurosurgery and Stereotaxy, Friedrich-Alexander-Universität Erlangen-Nürnberg, Erlangen, Germany.

\*Corresponding authors: Alessandro Del Vecchio ([alessandro.del.vecchio@fau.de](mailto:alessandro.del.vecchio@fau.de)); Thomas Mehari Kinfe ([thomasmehari.kinfe@uk-erlangen.de](mailto:thomasmehari.kinfe@uk-erlangen.de))

**The paralysis of the muscles controlling the hand dramatically limits the quality of life of individuals living with spinal cord injury (SCI). Here, we present a non-invasive neural interface technology that will change the lives of individuals living with cervical SCI (C4-C6). We demonstrate that eight motor- and sensory-complete SCI individuals (C5-C6, n = 7; C4, n = 1) are still able to task-modulate in real-time the activity of populations of spinal motor neurons with spared corticospinal pathways. In all tested patients, we identified groups of motor units under voluntary control that encoded a variety of hand movements. The motor unit discharges were mapped into more than 10 degrees of freedom, ranging from grasping to individual hand digit flexions and extensions. We then mapped the neural dynamics into a real-time controlled virtual hand. The patients were able to match the cue hand posture by proportionally controlling four degrees of freedom (opening and closing the hand and index flexion/extension). These results demonstrate that wearable muscle sensors provide access to voluntarily controlled neural activity in complete cervical SCI individuals.**

Impaired hand function is arguably one of the most severe motor deficits in subjects with SCI, especially when bilateral<sup>1</sup>. There are currently no effective treatments for regaining control of the hand after muscle paralysis. Hand surgery is established, although not possible in every case, and with several limitations<sup>2</sup>. Restoration of hand function has so far been achieved by neural interfaces recording the activity of the motor cortex<sup>3</sup>, either through closed-loop electrical stimulation of the muscle<sup>4</sup> or by controlling external devices<sup>5</sup>. However, besides the relatively poor control, invasive cortical implants are also an option limited to a small proportion of patients because of the surgical risks and long-term stability of the implant. Other neural interfaces involve the delivery of electrical stimulations in the spinal cord that indirectly targets the activity of the alpha motor neurons<sup>6</sup>.

The neural information most directly associated with behavior is the activity of spinal alpha motor neurons, which are the final common pathways of the neuromuscular system<sup>7</sup>. The activity of spinal motor neurons encodes movement through a simple linear transformation (the dynamics of the twitch

NOTE: This preprint reports new research that has not been certified by peer review and should not be used to guide clinical practice.

47 forces of the muscle units) and therefore movement intent can be decoded directly. Almost all SCI are  
48 due to contusions of the spinal cord, which could leave some spared connections above and below the  
49 level of the injury<sup>8</sup>. While this spared neural activity is not sufficient to drive muscles for the generation  
50 of detectable forces, it can be used to infer motor intent and therefore to decode movements.  
51 Accordingly, we have recently reported in a single motor-complete SCI (C5-C6) individual, as a case  
52 study, the presence of a significant number of task-modulated motor units encoding the flexion and  
53 extension of individual fingers through a wearable, non-invasive neural interface<sup>9</sup>. That case study was  
54 a proof of concept in a single patient, and it was limited to offline analysis without any demonstration  
55 of patient-in-the-loop control. Here, we provide for the first-time evidence of voluntarily controlled  
56 spinal motor neurons in a relatively large group of SCI individuals (motor and sensory complete ranging  
57 from C4 to C6, Figure 1, Table 1, Video 1, 2). Through the decomposition of the high-density  
58 electromyogram (HDsEMG)<sup>10-12</sup>, we observed the presence of active motor neurons in all tested  
59 patients (Figure 1).

60 Figure 1 shows an overview of the offline experiments where subjects were asked to match the visual  
61 cue displayed through a virtual hand. The virtual hand displayed hand opening and closing, two and  
62 three-finger pinch, and individual digits movement (flexion and extension) at 0.5Hz movement velocity.  
63 Figure 1a shows the experimental setup, with 320 electrodes placed on the proximal and distal forearm  
64 muscles and tendons. Figure 1b shows six EMG channels and a motor unit waveform superimposed on  
65 a heatmap based on the root mean square activity (Figure 1c). In all tested patients, we observed clear  
66 motor unit action potentials with high signal-to-noise ratios (>30dB<sup>13</sup>). We then looked at how these  
67 motor units were controlled by studying the association between motor unit activation times (Figure  
68 1d) and the movement trajectories of the digit tip of the virtual hand (grey lines in 1d). The raster plot  
69 in Figure 1d shows a clear grouping of motor units encoding flexion and extension movements during  
70 the two-finger pinch task. As in our previous experiment<sup>9</sup>, we used a factorization method to retrieve  
71 the motor dimension (flexion and extension of the motor units, 1e-f).

72 For all tested individuals, we were able to consistently identify some motor neurons that were  
73 controlling the flexion and extension movements (Supplementary Figs.). Figure 1g-h shows a summary  
74 of all subjects and tasks. For all the tasks (Fig. 1g-h), we identified a specific subpopulation of motor  
75 units that encoded that specific movement, with an average of  $9.8 \pm 0.7$  motor units per task. Because  
76 of the large number of units, we were able to identify unique units virtually in all recorded tasks, which  
77 gives a perfect classification accuracy for all these motor dimensions. Therefore, after years of cervical  
78 spinal cord injuries leading to motor and sensory complete paralysis (ranging from 5.0 to 24.2 years,  
79 Table 1), these subjects still had spared connections from motor cortex impinging the activity of spinal  
80 motor neurons. This is evidenced by the fact that these motor units showed high voluntary modulation  
81 that matched with high degrees of accuracy the virtual hand movements (Fig. 2a). Figure 2a shows all  
82 the identified motor units for two individuals and all tasks. These previous results are based on the  
83 prediction accuracies and number of motor dimensions from the offline decomposition of the HDsEMG.

84

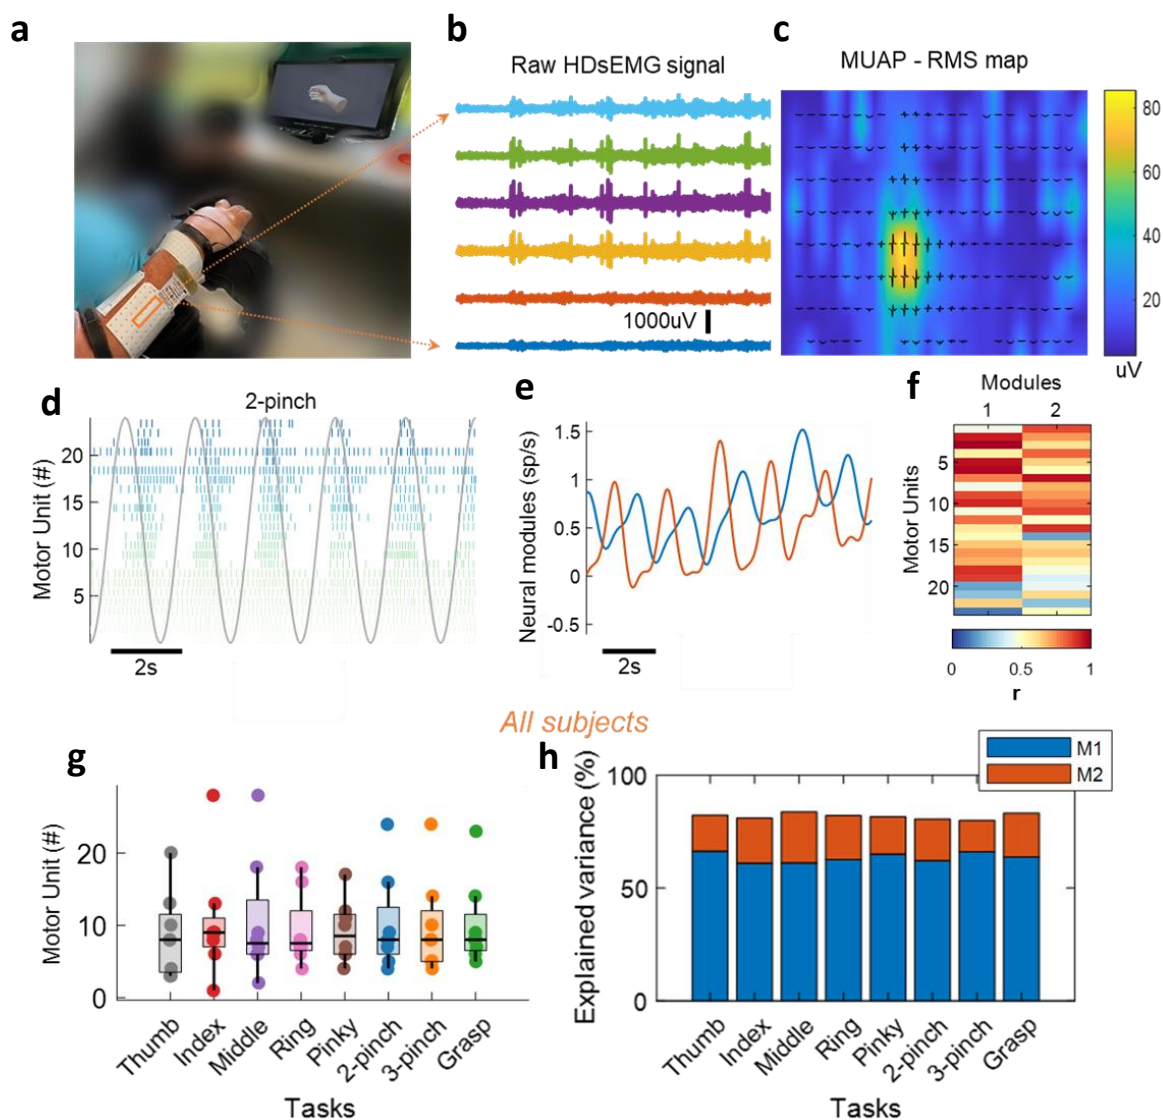

**Figure 1** | **a.** Experimental setup consisting of 320 surface EMG electrodes placed in the forearm muscles. The movement instructions were guided by a virtual hand video displayed on a monitor in front of the subject. **b.** A few example electrodes show raw HDsEMG signals while the subject attempts a grasp task (flexion and extension of the fingers, 0.5Hz). **c.** Example of spatial mapping based on the root mean square values of the motor unit action potential. **d.** Raster plot of motor unit firings (color-coded) identified during 10s of the two-finger pinch task. **e.** Neural modules extracted for the same task, using factorization analysis. **f.** Pearson correlation values ( $r$ ) of the individual motor units with the two neural modules. **g.** Number of identified motor units (MUs) across all tasks and subjects (each dot represents one subject). **h.** Percentage of explained variance by the two neural modules (M1 – blue and M2 – red) averaged across all subjects for each task.

85

86 In a second experiment, which was collected on average 3-5 months after the first session, six subjects  
87 were tested again with a similar experimental procedure but tuned for real-time control. The subjects  
88 were asked to proportionally control a moving cursor on a screen based on the real-time decoding of  
89 the discharge timings of motor neurons (Figure 2c-d). Moreover, the tested individuals also controlled  
90 a virtual hand (Figure 2f-i, Video 2), demonstrating full voluntary control of the decoded neural activity.

91 We developed a real-time mapping of the discharge timings of motor neurons so that the patients could  
92 control a virtual hand and a cursor on the screen with the motor unit discharge activity and the HDsEMG  
93 signal (Figure 2, Video 1). After a few seconds of training (see Fig. 2d), the subjects were able to control

94 the motor unit firing patterns and progressive recruitment of motor units at different target forces and  
95 with high accuracies (Fig. 2b-d). In this experiment, we also used a supervised machine learning  
96 algorithm to control a virtual hand (Fig. 2f-i, Video 2).

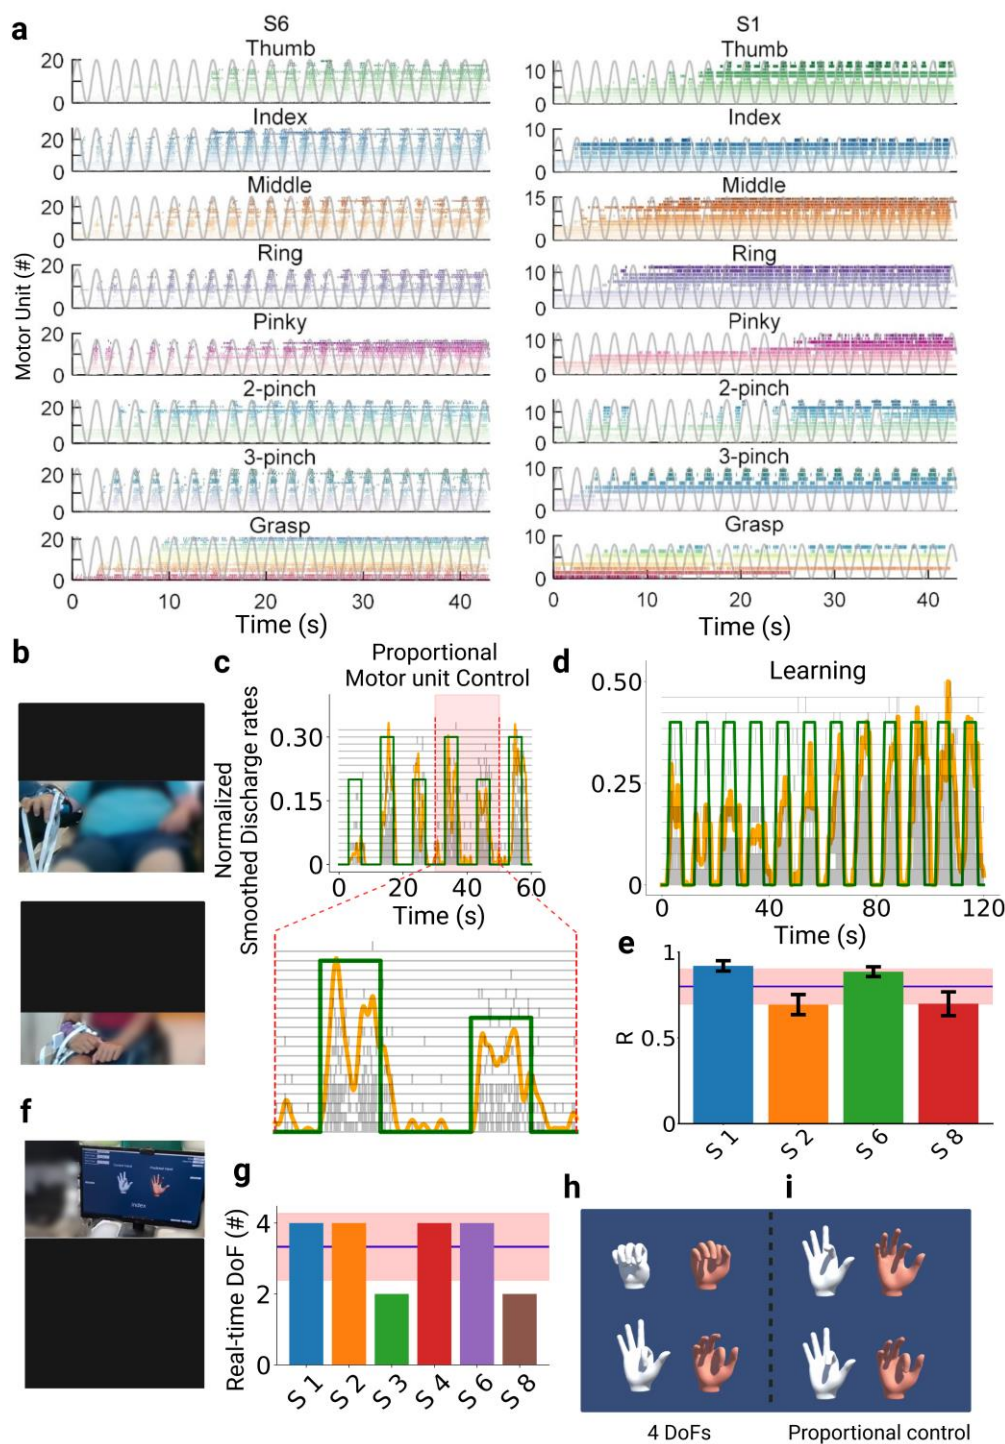

**Figure 2** | **a**. Raster plot for all motor units identified during the respective task (color-coded) and the virtual hand movement trajectories (grey line). Note the task-modulated activity of the motor unit firing patterns, that encoded flexion and extension movements. **b**. Real-time tasks for two participants (S1 and S6). **c**. The participants were asked to follow a trajectory on a screen (green line) by imagining a grasp movement. The motor unit were decomposed online, and the cumulative smoothed discharge rate (yellow line) was used as biofeedback. After few seconds of training (**d**), the subjects could track the trajectories with very high accuracies and at different target levels (c). **e**. Cross-correlation coefficient (R) between the smoothed discharge rate and the requested tasks for 4 subjects. **f**. After the online motor unit decomposition, we used a supervised machine learning method to proportionally control the movement of a virtual hand. Four out of six subjects were able to proportionally open and close the hand (**g-i**), and proportionally control in both movement directions (flexion and extension) the index finger (**h-i**). These subjects were able to control four degrees of freedom (DoFs) that corresponded to hand opening, closing, index flexion and extension.

98 Video 1 shows a subject that controls the activity of groups of motor units in real-time, modulating the  
99 recruitment and discharge rate to proportionally hit two different target levels of activation. The motor  
100 neuron discharge times were summed and normalized in real time to the number of active neurons so  
101 that the patients could modulate a moving object (yellow cursor, Fig. 2c-d) by increasing/decreasing  
102 the discharge rates. Figure 2c shows the proportional control of two target levels that was mediated by  
103 both the concurrent recruitment of additional units (grey raster plot) and higher discharge rates. Figure  
104 2d shows a complete recording set that lasted 120 seconds. Note that just after 50 seconds of training  
105 the subject was able to move the cursor on relatively high levels of normalized motor unit activity. The  
106 scaling of the motor unit activity is based on a simple equation that considers the maximal motor unit  
107 discharge activity and the highest number of motor units that were identified during an off-line  
108 calibration trial, that lasted 10 seconds for each trained task.

109 We then trained the subjects to move a virtual hand that was displayed on a monitor and to match the  
110 movement of a control hand (Fig. 2f-i, Video 2). After this training, the subjects were able to  
111 proportionally open and close the hand with high levels of accuracy, when compared to the control hand  
112 instructions (Fig. 2i, Video 2). Most of the subjects were able to proportionally flex and extend the  
113 index finger (two degrees of freedom) and open and close the hand (two degrees of freedom). Figure 2f  
114 shows the subject's view: the monitor displayed two hands, a control hand (white color), and a second  
115 hand that was controlled by a regression-based machine learning algorithm. Four out of 6 subjects (Fig.  
116 2g) were able to control four degrees of freedom consisting of proportional control of index flexion and  
117 extension and hand opening and closing (Fig. 2h-i, Video 2). It is important to note that each experiment  
118 across all patients did not last more than 3 hours, with most of the time used for placing the electrodes  
119 and explaining the tasks. Although we did not measure the time it took for the subject to control the  
120 virtual hand and 2D cursor control, it surely did not take more than 30 minutes accounting even for the  
121 subjects with the highest level of wrist and hand paralysis. This can be further improved once the  
122 subjects are trained with the task. In sum, the presented technology has a direct clinical translation for  
123 both home and hospital use for restoring and monitoring the spared corticospinal connections after  
124 traumatic SCI.

125 The results presented above provide for the first-time evidence of voluntarily controlled spinal motor  
126 neurons in a relatively large group of SCI subjects (motor and sensory complete ranging from C4 to  
127 C6) that have been paralyzed for decades. We observed the presence of active modulation of motor  
128 neuron activity in all tested patients. We then developed a real-time mapping of the discharge timings  
129 of motoneurons so that the patients could control a virtual hand. The tested patients performed virtual  
130 hand tasks accurately and proportionally, demonstrating full voluntary control of the decoded neural  
131 activity. The results indicate that motor- and sensory-complete SCI patients maintain relevant neural  
132 activity as output of the spinal cord circuits below the lesion and that they can accurately control this  
133 activity to regain hand function. Wearable muscle sensors are therefore a technology that may compete  
134 in terms of clinical viability and efficacy with invasive brain or spine implants for restoring hand  
135 function in complete SCI patients. We contend that the proposed non-invasive approach is a clinically  
136 superior solution to hand function restoration in SCI than the current invasive brain and spinal neural  
137 interfaces.

138

## 139 **References**

- 140 1. Snoek, G.J., Ijzerman, M.J., Hermens, H.J., Maxwell, D. & Biering-Sorensen, F. *Spinal Cord*  
141 **42**, 526–532 (2004).
- 142 2. Fridén, J., House, J., Keith, M., Schibli, S. & van Zyl, N. *J. Hand Surg. (European Vol. 47,*  
143 *105–116 (2022).*
- 144 3. Collinger, J.L. et al. *Lancet* **381**, 557–564 (2013).

- 145 4. Bouton, C.E. et al. *Nature* **533**, 247–250 (2016).
- 146 5. Benabid, A.L. et al. *Lancet Neurol.* **18**, 1112–1122 (2019).
- 147 6. Barra, B. et al. *Nat. Neurosci.* **25**, (2022).
- 148 7. Eccles, J.C. & Sherrington, C.S. *Proc. R. Soc. B Biol. Sci.* **106**, 326–357 (1930).
- 149 8. Sherwood, A.M., Dimitrijevic, M.R. & Barry McKay, W. *J. Neurol. Sci.* **110**, 90–98 (1992).
- 150 9. Ting, J.E. et al. *J. Neurophysiol.* (2021).doi:10.1152/jn.00220.2021
- 151 10. Del Vecchio, A. et al. *Sci. Adv.* **6**, eabc3916 (2020).
- 152 11. Del Vecchio, A. et al. *J. Physiol.* **597**, 2445–2456 (2019).
- 153 12. Farina, D. & Holobar, A. *Proc. IEEE* **104**, 353–373 (2016).
- 154 13. Holobar, A., Minetto, M.A. & Farina, D. *J. Neural Eng.* **11**, 016008 (2014).
- 155 14. Barsakcioglu, D.Y., Bracklein, M., Holobar, A. & Farina, D. *IEEE Trans. Biomed. Eng.* **68**,  
156 926–935 (2021).
- 157 15. Negro, F., Muceli, S., Castronovo, A.M., Holobar, A. & Farina, D. *J. Neural Eng.* **13**, 026027  
158 (2016).
- 159 16. Holobar, A. & Zazula, D. *IEEE Trans. Signal Process.* **55**, 4487–4496 (2007).
- 160 17. Hoerl, A.E. & Kennard, R.W. *Technometrics* **12**, 55–67 (1970).
- 161 18. Sierra González, D. & Castellini, C. *Front. Neurobot.* **7**, (2013).
- 162 19. Patel, G.K., Nowak, M. & Castellini, C. *IEEE Trans. Neural Syst. Rehabil. Eng.* **25**, 967–975  
163 (2017).
- 164 20. Strazzulla, I., Nowak, M., Controzzi, M., Cipriani, C. & Castellini, C. *IEEE Trans. Neural*  
165 *Syst. Rehabil. Eng.* **25**, 227–234 (2017).
- 166 21. Nowak, M., Vujaklija, I., Sturma, A., Castellini, C. & Farina, D. *IEEE Trans. Biomed. Eng.* 1–  
167 12 (2022).doi:10.1109/TBME.2022.3194104
- 168 22. Del Vecchio, A. et al. *J. Electromyogr. Kinesiol.* **53**, 102426 (2020).

169

170

171

172

173

174

175

176

177

178

179

## 180 **Methods**

181 Eight participants with spinal cord injury (SCI) were recruited for this study (Seven individuals with  
182 chronic motor complete SCI and one with motor incomplete SCI). The inclusion criteria were: (1) injury  
183 level C4-C6 and (2) age between 18 and 60 years old (3) absence of voluntary movement of one hand  
184 or both hands. Participants S6 and S7 presented movement of the left hand. All participants gave their  
185 written informed consent to take part in the study. The study was conducted in agreement with the  
186 Declaration of Helsinki, and it was approved by the Friedrich-Alexander-Universität Ethics Committee  
187 (application 22-138-Bm).

188

189 Table 1 – Characteristics of research participants, including the average number of motor units (MUs)  
190 identified per task (mean  $\pm$  SD) for each subject

| Subject | Age range (years) | Gender | Injury level | AIS | Wrist movement | Time since injury (years) | Number of MUs/task |
|---------|-------------------|--------|--------------|-----|----------------|---------------------------|--------------------|
| S1      | 36-40             | M      | C6           | B   | yes            | 18.8                      | 14.5 $\pm$ 2.0     |
| S2      | 31-35             | M      | C5           | B   | yes            | 9.1                       | 8.1 $\pm$ 1.2      |
| S3      | 41-45             | F      | C6           | B   | yes            | 24.2                      | 3.5 $\pm$ 1.4      |
| S4      | 36-40             | F      | C5           | A   | yes            | 24.2                      | 7.3 $\pm$ 2.3      |
| S5      | 31-35             | M      | C4           | A   | no             | 22.2                      | 8.4 $\pm$ 0.7      |
| S6      | 56-60             | M      | C5           | A   | no             | 6.9                       | 22.8 $\pm$ 4.2     |
| S7      | 41-45             | M      | C6           | C   | no             | 18.2                      | 7.4 $\pm$ 2.0      |
| S8      | 36-40             | F      | C5           | B   | yes            | 5.0                       | 5.9 $\pm$ 1.2      |

191

### 192 *Study overview/Experimental protocol*

193 This study was conducted in two sessions. In the first session, subjects were instructed to attempt  
194 movements shown by videos of a virtual hand while high-density electromyographic (HDsEMG)  
195 signals from their forearm were recorded. For the second session, 6 subjects returned after 3-5 months  
196 of the first session, in which a regression model (based on global EMG) and/or an online decomposition  
197 method was used to decode movement intention, according to their HDsEMG signals.

198 In the first session, 320 HDsEMG electrodes were placed in the forearm of the participants' dominant  
199 hand (subject 7 was paralyzed only on the non-dominant hand). The subjects were then asked to stay in  
200 a comfortable position with their arm (Fig. 1a and 2b,f). With a computer monitor in front of them,  
201 videos of a virtual hand performing different tasks were displayed and the participants were instructed  
202 to attempt the movements accordingly. The tasks included movement of the individual digits, grasp,  
203 two-finger pinch, and three-finger pinch at two different speeds (0.5Hz and 1.5Hz), and lasted 42s each.  
204 Two trials were performed for each movement. Only data from 0.5Hz movements were analyzed due  
205 to the difficulty of the subjects in performing fast movements.

206 In the second session, using the same electrode configuration as the first visit, first, an EMG-to-  
207 activation regression model was built: subjects were asked to attempt a full flexion of their fingers  
208 according to the tasks that were easier for them to perform, and their EMG signals were acquired and  
209 associated to synthetic ground truth representing maximal activation for the relevant degrees of  
210 freedom. After that, the participants attempted the flexion/extension of the digits, and the predicted  
211 activation was shown to them in real time through a virtual hand interface ('predicted hand'). A virtual  
212 hand showing a predefined movement (referred here as 'control hand', Fig. 2f,h-i) was used to help the  
213 subjects to perform the movements and for further analysis.



214 Also in this session, we tested a real-time EMG decomposition approach (offline decomposition  
215 followed by online decomposition). We used 128 HDsEMG electrodes to assess if the subjects would  
216 be able to follow a digital trajectory with their motor units smoothed cumulative discharge rate. First,  
217 during the offline decomposition, HDsEMG data were recorded while the participants were asked to  
218 attempt a maximum flexion of the digits (10s per task). The recorded data is decomposed as described  
219 in the ‘Online decomposition’ section and the decomposition results are stored for the online task.

220 Subsequently, in the online decomposition step, the subjects were instructed to follow a periodic  
221 rectangular waveform trajectory shown on a monitor, with 10s period (5s of rest in between), for 60-  
222 120s. For two consecutive periods, the subjects were asked to attempt flexion and extension of the same  
223 digits as performed in the offline decomposition. The motor unit firings detected with this method  
224 (smoothed motor unit firings) were also shown as feedback to the subjects.

225 Lastly, we also tested if the subjects would be able to increase their discharge rate and progressive  
226 recruitment of motor units by increasing the height of the ramp. The rectangular trajectories have two  
227 different activation levels, 20% and 30% of maximum neural activation. The discharge rate was  
228 normalized using the maximum discharge rate obtained during the brief offline decomposition step.

### 229 *Virtual hand videos and interface*

230 The 3D model of the hand used to instruct the subjects during the recordings was developed in Blender  
231 (Blender 3.0, Blender Foundation). The appearance of the virtual hand was modified to resemble a real  
232 human hand, a texture was applied to provide a better experience to the participants. Thirteen videos of  
233 the hand model were generated in Blender, each of them corresponding to one task/hand movement  
234 (individual digits flexion/extension at 0.5 Hz and 1.5Hz, grasp, two-finger pinch, and three-finger  
235 pinch). Figure 1a shows an example of the virtual hand that was displayed to the subjects.

236 The virtual hand interface was created to communicate with the regression model. This interface was  
237 generated using the software Unity (Unity Software Inc). An improved virtual hand model (mesh object  
238 from VIVE Wave SDK - <https://hub.vive.com/storage/docs/en-us/index.html>) was used, which allows  
239 more degrees of freedom for the right hand (with 17 bones). The interface shows two virtual hands: the  
240 former shows the movements to be performed (control hand) and the latter (predicted hand) is connected  
241 to the regression model and shows the output obtained directly from the HDsEMG signals. Therefore,  
242 by comparing the control and the predicted hand, we can understand the amount of flexibility of control  
243 that is spared after the injury.

### 244 *HDsEMG recordings*

245 For electrode placement, the forearm skin was shaved and cleansed with 70% ethyl alcohol. The ulna  
246 bone was marked with a skin marker. Five grids of 64 surface EMG electrodes were placed over the  
247 forearm muscles (3 squared grids of 8 rows x 8 columns configuration, with interelectrode distance  
248 (IED) of 10mm; 2 rectangular grids - 13x5, IED = 8mm; OT Bioelettronica, Turin, Italy). The squared  
249 grids were placed aligned to the ulna bone, while the rectangular ones were placed posterior and anterior  
250 in the forearm, above the wrist joint. The grids were attached to the skin using bi-adhesive foam, that  
251 was placed aligned to the electrodes and filled with conductive paste (SpesMedica, Battipaglia, Italy).  
252 The grids were then secured with tape. The reference for the electrode grids was placed on the elbow  
253 joint, and the main ground electrode was placed on the styloid process of the ulna. The HDsEMG signals  
254 were recorded using a multichannel amplifier 16-bit A/D (Quattrocento, OT Bioelettronica). The signals  
255 were recorded in monopolar mode using the software OT BioLab+, with sampling frequency of 2048Hz  
256 and a bandpass filter 10-500Hz. The recordings were synchronized with the start of the virtual hand  
257 videos. For the second part of the experiments, HDsEMG signals were streamed in real-time using a  
258 Transmission Control Protocol/Internet Protocol (TCP/IP) for communication. For this, the software  
259 OT BioLab Light was used, with the following settings: 2048Hz sampling frequency, bandpass filter  
260 10-500Hz, and 8Hz refresh rate (for online decomposition) or 16Hz refresh (for the regression model).

## 261 *Online decomposition*

262 To decompose the EMG signal into individual motor units, we used a combination of fast independent  
263 component analysis (fastICA) and convolutive kernel compensation (CKC). This method involves a  
264 convolutive sphering (extension and whitening) of the measurement matrix, followed by an iterative  
265 optimization of separation vectors that maximizes the non-gaussianity. This approach allows an  
266 automatic decomposition of the sources. Video 1 shows the real-time decomposition and the modulated  
267 motor unit activity for a subject with SCI and Figure 2c-e the performance of the subjects to track a line  
268 on a screen by modulating the discharge rates of the motor units.

269 A script in Python was developed to show the motor unit firings detected with this method (smoothed  
270 motor unit firings) as feedback to the subjects, while they were requested to follow a rectangular  
271 trajectory of 10s period (Video1 and Figure 2c-e). A cross-correlation was applied between the target  
272 levels and the normalized cumulative discharge rates (Figure 2c). The average correlation coefficient  
273 of every 20s trials for each subject was used as a metric.

274 The online decomposition is divided into two parts. The first part is the offline decomposition, in which  
275 the EMG data is recorded for each task the subject was asked to perform in real-time. The length of the  
276 recorded signal is 10s, and the subjects were asked to perform a full flexion of one or more digits during  
277 the recording (in separate trials). Then, the recorded data is decomposed using fastICA, which is based  
278 on the convolutive blind source separation method (described below in detail). The results of fastICA  
279 are the individual extracted sources and their respective separation vector. The separation matrix and  
280 the individual action potentials of the motor units (MUAPs) are stored for the online task. The individual  
281 MUAPs are computed by the spike-triggered average (STA) using the extracted sources. Before the  
282 real-time decomposition begins, the individual separation matrices are merged into a single matrix, and  
283 duplicates are flagged by calculating the Pearson correlation coefficient between the MUAPs.

284 During real-time decomposition, a periodic rectangular waveform trajectory (10s period, 5s of rest in  
285 between) is displayed continuously to the subject for one to two minutes. The waveforms have two  
286 different required activation levels with 20% and 30% of maximum neural activation. For each period,  
287 the subject was asked to perform one of the tasks from the offline decomposition. To circumvent the  
288 computational complexity obstacle of whitening in real-time, the observations from the same controlled  
289 task are expanded and then directly multiplied by the stored separation matrix from the offline part. The  
290 results of this multiplication are considered as the extracted sources and then correlated with the MUAP  
291 templates (template matching). To distinguish between noise and neural activity, the maximum noise  
292 power is calculated in the first data frame where the subject is assumed not to move (no ramp). If the  
293 calculated correlation coefficient is above a predefined threshold and the signal has an SNR higher than  
294 a scalar multiple of the maximum noise level (see below), it is classified as a spike.

295 To decompose the HDsEMG signal into the individual motor units in real-time, the general approach  
296 of offline decomposition followed by online decomposition described by Barsakcioglu and Farina  
297 (2018) was adopted<sup>14</sup>. The offline decomposition method is based upon the iterative extraction of  
298 sources from the convolutive sphering (extension and whitening) of observations described in Negro et  
299 al. (2016)<sup>15</sup> and Holobar and Zazula<sup>16</sup>. We have tailored the current general structure of the algorithm  
300 for the current data from SCI individuals, as described below.

301 We can model the HDsEMG generation process as a convolutive mixture of the pulse trains and the  
302 action potentials of motor units, in matrix form:

$$303 \quad x(k) = \sum_{l=0}^{L-1} H(l)s(k-l) + n(k)$$

304 where  $x(k) = [x_1(k), x_2(k), x_3(k), \dots, x_m(k)]^T$  are the HDsEMG signals recorded from  $m$  EMG  
305 channels (number of observations) with  $x_i(k)$  being the signal recorded from the  $i^{\text{th}}$  channel,  $s(k) =$

306  $[s_1(k), s_2(k), s_3(k), \dots, s_n(k)]^T$  are the firing patterns of  $n$  motor units (number of sources).  $H$  is the  
307 mixing matrix of dimension  $m \times n$  which carries the information of motor unit action potentials  
308 (MUAP), with  $L$  being the duration of the action potentials and  $l$  each sample;  $n(k)$  is the unidentified  
309 noise term for each channel. With the motivation of increasing the ratio between the number of  
310 observations and the number of sources, the observations are extended using R-lagged samples, where  
311  $R=1000/m^{15}$ . From the extended observations, a whitening matrix is derived by performing eigenvalue  
312 decomposition of the covariance matrix of the extended observations. Then a fixed-point iterative  
313 algorithm with Gram-Schmidt Orthogonalization is used to maximize the number of uniquely identified  
314 sources. Next, a silhouette score-based K-means driven approach is adopted to detect the spikes from  
315 the decomposed source that involves the second iteration of the CKC approach to remove the unreliable  
316 sources, as described in<sup>15</sup>. This offline decomposition prior to online decomposition can be  
317 conceptualized as a training phase from which the separation matrix is extracted which contains the  
318 separation vectors. Also, the MUAP templates from the extracted sources are generated using spike-  
319 triggered-averaging (STA) from the offline decomposition and stored in a matrix.

320 In the real-time (online decomposition phase), the observations obtained from the same controlled task  
321 are extended and then directly multiplied with the separation matrix to avoid the impediment of  
322 computational complexity due to whitening. The outcomes of this multiplication are considered to be  
323 extracted sources and then subjected to a further 2D cross-correlation template matching technique  
324 where the MUAPs extracted for each of the sources were used as the template. Since the MUAPs are  
325 the results of the convolution of the action potential and Dirac delta pulses, we can obtain MUAP shapes  
326 from their discharge times as having a repetition of the action potential at the time instances of the Dirac  
327 pulses. Therefore, we used the shapes of the action potentials to perform a cross-correlation between  
328 each of the samples of the extracted single MUAP and the MUAP of the corresponding channels in  
329 real-time, for a further validation step. The Pearson's normalized cross-correlation coefficient is defined  
330 as,

$$331 \quad r_{hy} = \frac{\sum_{i=1}^K (h_i - \bar{h})(y_i - \bar{y})}{\sqrt{\sum_{i=1}^K (h_i - \bar{h})^2 (y_i - \bar{y})^2}}$$

332 where,  $h$  is the template, i.e. the MUAP shape, and  $y$  is the windowed segment of size  $K$  of the single  
333 MUAP which has to be correlated to the MUAP shape to detect the spikes. This window is rolled over  
334 the entire signal to find the correlation coefficient concerning the MUAP. From the outcome of the first  
335 frame of the real-time sEMG decomposition, the maximum noise power was also calculated because  
336 the first frame in our experimental setup contained no physical activity. The samples in the extracted  
337 sources of the real-time decomposition which showed a cross-correlation coefficient more than a  
338 predefined threshold and exhibit SNR higher than a scalar multiple times the maximum noise level was  
339 sorted as a spike. This approach allows an automatic decomposition of the sources.

340 The spike sorting in the offline decomposition task was performed using the Silhouette threshold of 0.9.  
341 In order to set up the real-time decomposition, a range of cross-correlation coefficients between 0.50-  
342 0.70 was chosen to perform the template matching-based spike sorting. To perform the template  
343 matching, MUAPs of the length of 30 samples, i.e. approximately 15ms long MUAPs were extracted  
344 through spike-triggered averaging using the spike time instances and the decomposed SMUAPs. The  
345 performance of the real-time EMG decomposition was evaluated both qualitatively, i.e. through  
346 visualization of the overall shape of the envelope of the firings, and quantitatively by computing the  
347 rate of agreement (ROA). The ROA is defined as:

348

349 
$$ROA = \frac{c_j \times 100\%}{OF_j + RT_j + c_j}$$

350 Where  $c_j$  is the total number of firings of the  $j^{\text{th}}$  motor unit identified by both offline and online  
351 decomposition,  $RT_j$  is equal to the total number of firings of the  $j^{\text{th}}$  motor unit identified in online  
352 decomposition only,  $OF_j$  is the total number of firings of the  $j^{\text{th}}$  motor unit identified by offline  
353 decomposition only. The choice of the hyperparameters  $r_{hy}$  and SNR threshold required to perform  
354 spike-sorting was made from an isometric ramp task experiment with 64 channel HD-sEMG signal  
355 collected from the tibialis anterior muscle of a healthy individual by picking up the combination yielding  
356 the best ROA obtained by performing online decomposition. The correlation coefficient of 0.60 and  
357 SNR threshold of 10 was selected to set up the real-time decomposition framework as they indicated  
358 high accuracy between offline and online decomposition<sup>14</sup>.

### 359 *Regression-based simultaneous and proportional control*

360 A regression-based machine-learning method was used to simultaneously and proportionally estimate  
361 the amount of required activation of each degree of freedom of the virtual hand. Namely, we used  
362 Incremental Ridge Regression<sup>17</sup>. Ground truth was provided by artificially associating minimal and  
363 maximal activation values to EMG signals gathered from the participants while they were being asked  
364 to minimally and maximally perform specific actions (i.e., flexion and extension of the digits)<sup>18</sup>. The  
365 bandpass filtered EMG signals from the Quattrocento were processed as follows: first, a non-  
366 overlapping moving window FIR low pass filter was applied (cut-off frequency 200Hz). In order to  
367 improve visualization, the signal was multiplied by a factor of 35. Then, the absolute value of the signal  
368 was extracted. Then, the signal was low-pass filtered again through a first-order IIR filter with a  
369 response of the form  $y(k) = \alpha x(k) + (1 - \alpha)y(k - 1)$  (cutoff frequency 1Hz). After this, an adaptive  
370 filter was employed. This is a first-order IIR filter, the cutoff frequency  $F_c$  of which is determined by  
371 the instantaneous value of the signal  $s(t)$  itself and of its first-order time derivative according to  $F_c =$   
372  $\exp(8|IIR_{\alpha=0.6}(x(k) - x(k - 1))| - 7|x(k)|)$ , where  $IIR_{\alpha=0.6}(|\dot{s}(t)|)$  represents the first-order time  
373 derivative of the signal low pass filtered through an IIR filter with  $\alpha = 0.6$ . The signal was then  
374 subsampled at 25Hz. An adaptive IIR filter like the one described above was also applied to the  
375 prediction from the ridge regression model. The values for all the coefficients used for signal filtering  
376 were set empirically following a series of pre-tests.

377 Despite its simplicity, Ridge Regression has recently been proven highly effective when applied to the  
378 problem of multi-DoF simultaneous and proportional prosthetic myocontrol using high-density *surface*  
379 *electromyography*<sup>19-21</sup>. The adaptive filter is used here to exploit the heteroscedasticity of the EMG  
380 signal, which tends to be noisier if the mean value is higher.

### 381 *Offline HDsEMG decomposition*

382 The monopolar HDsEMG signals were first band-pass filtered (20-500Hz) with a Butterworth second-  
383 order filter. The data from all 5 electrode grids were concatenated into one matrix. To identify the  
384 individual motor units, these HDsEMG signals were decomposed through a blind source separation  
385 method (convolutive kernel compensation algorithm). The software DEMUSE (v. 4.5; The University  
386 of Maribor, Slovenia) was used for that<sup>16</sup>, which automatically detects the motor unit discharge times.  
387 After that, a visual inspection of the identified motor unit spike trains was performed, to account for  
388 false positive/false negative detected spikes, as described previously<sup>22</sup>. Only the motor units with a  
389 pulse-to-noise ratio > 26dB before manual inspection were kept.

### 390 *Factor analysis*

391 A dimension-reduction technique, factor analysis, was applied to the smoothed discharge rate of all  
392 motor units identified for a task. The discharge rate was first low-pass filtered with a Hann window of  
393 1s (1Hz). Afterward, the function *factoran* from Matlab was applied to the matrix with the smoothed

394 discharge rates without any orthogonality constraint. This function uses the maximum likelihood  
395 method to estimate the common factors associated to the observed data (motor units discharge times).  
396 The Pearson correlation between the motor units' discharge rate and the fitted factors was then  
397 calculated. The observed data are assumed to be based on a linear combination of the common factors  
398 that explain most of the data variance. The percentage of the total variance explained by these factors  
399 was also calculated for each task from each subject and later averaged across all subjects for each one  
400 of the tasks.  
401
